# Supplementary material
Source: PubMed Central journal article supplement (PMC3070421)
Supplement: NIHMS272567-supplement-supplement_1.pdf [file NIHMS272567-supplement-supplement_1.pdf]

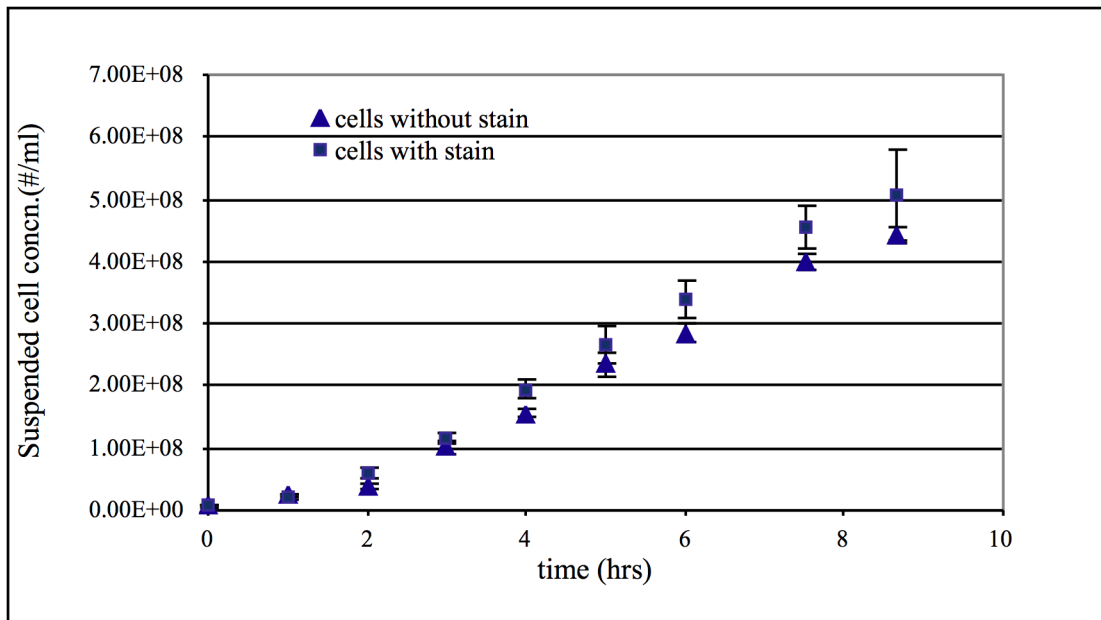

Figure S1 Batch culture growth of *Ppu2440* (miniTn7PA1/03/04egfp-a) bacteria. Chemically defined medium FAB was supplied as growth medium. Suspended cell concentrations (cell #/mL) were counted directly from GFP expressing cells (w/o stain) and after staining with Live/Dead BacLight™; total cell counts reported (w/stain) comprise live and dead cells. Initial substrate concentration was 10 g/L sodium citrate.

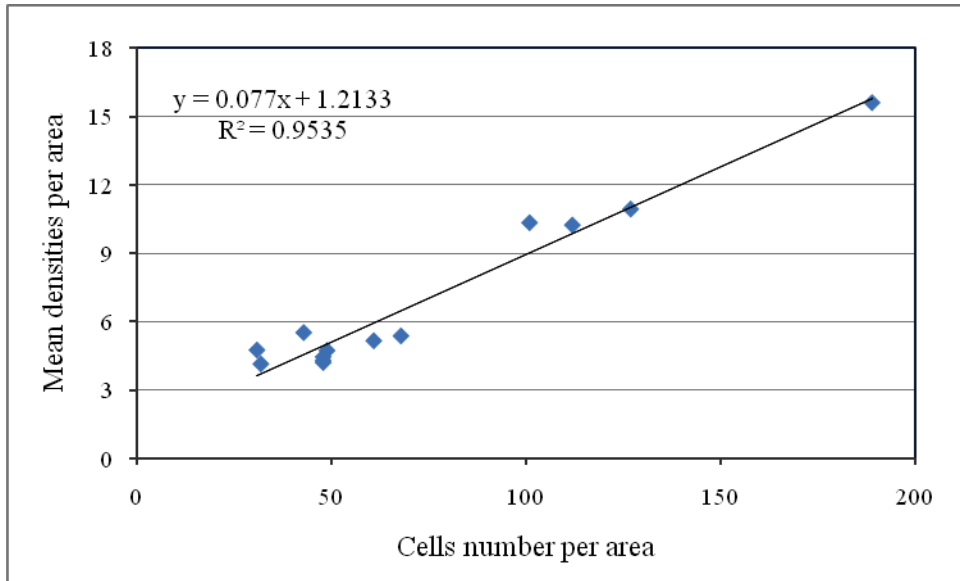

(a)

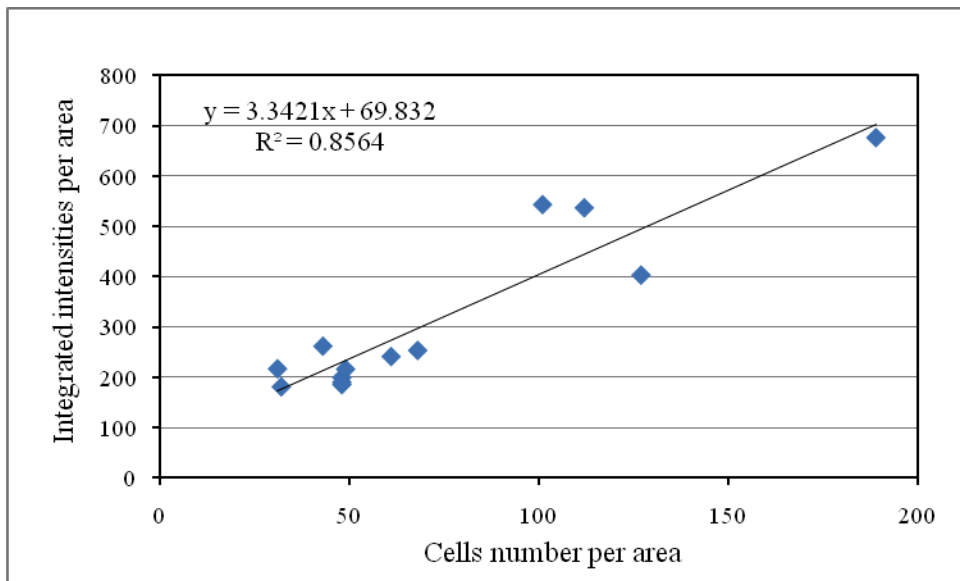

(b)

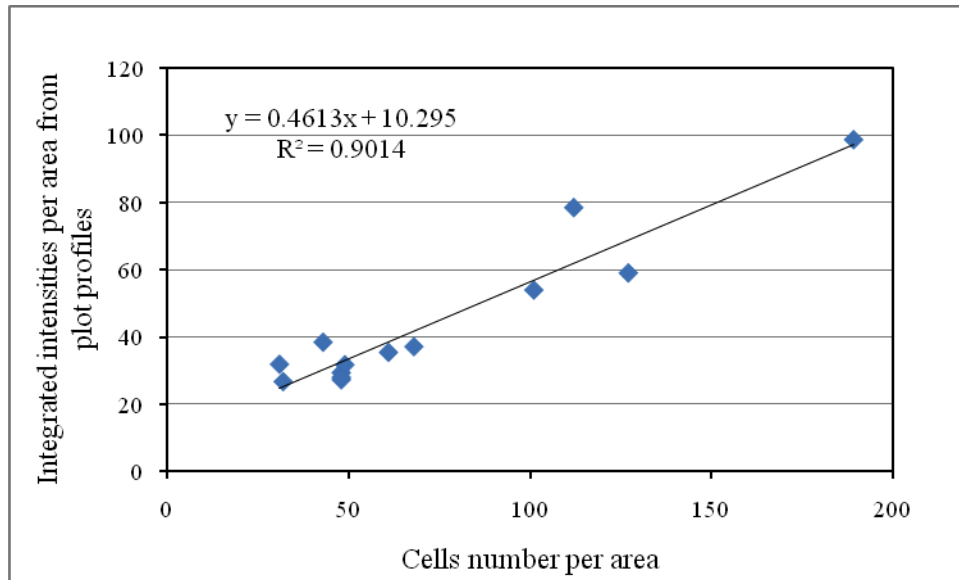

(c)

Figure S2 Total densities as a function of cells number per area. Linear trend lines were added to fit the sample data. Fitting equations and R-squared values were displayed for each of the fitting equations. (a) Method 1: Mean Density plotted as a Function of Cells Number per Area; (b) Method 2: Integrated density plotted as a Function of Cells Number per area; (c) Method 3: Integrated density from the “Plot Profile with” background subtracted plotted as a function of cells number per Area.

The images of *Ppu2440* (miniTn7PA<sub>1/03/04</sub>**egfp**-a) pure strain biofilms were taken with an epifluorescence microscope equipped with an X100 oil immersion lens. Area = 140 μm X 110 μm.
